# Supplementary material for: The association between periodontal disease and the risk of myocardial infarction: a pooled analysis of observational studies
Source: PubMed Central journal article supplement (PMC5286862; doi:10.1186/s12872-017-0480-y), 2017-02-01
Supplement: 12872_2017_480_MOESM2_ESM.pdf [file 12872_2017_480_MOESM2_ESM.pdf]

**Table S2. Quality scores of case-control and cohort studies using Newcastle-Ottawa Scale.**

| Methodological quality of studies included in the final analysis based on the Newcastle-Ottawa Scale for assessing the quality of Case-control studies and Prospective Cohort studies |                              |                             |                       |                        |                                                   |                                     |                                               |                  |       |
|---------------------------------------------------------------------------------------------------------------------------------------------------------------------------------------|------------------------------|-----------------------------|-----------------------|------------------------|---------------------------------------------------|-------------------------------------|-----------------------------------------------|------------------|-------|
|                                                                                                                                                                                       | Selection                    |                             |                       |                        | Comparability                                     | Exposure                            |                                               |                  |       |
| <b>Case-control studies(n=12)</b>                                                                                                                                                     | Adequate definition of cases | Representativeness of cases | Selection of controls | Definition of controls | Control for important factor or additional factor | Ascertainment of exposure(blinding) | Same method of ascertainment for participants | Nonresponse rate | Total |
| Persson GR et al., 2003                                                                                                                                                               | 1                            | 1                           | 1                     | 1                      | 2                                                 | 1                                   | 1                                             | 1                | 9     |
| Cueto A et al., 2005                                                                                                                                                                  | 0                            | 1                           | 0                     | 0                      | 2                                                 | 1                                   | 1                                             | 1                | 6     |
| Andriankaja OM et al., 2006                                                                                                                                                           | 1                            | 0                           | 1                     | 1                      | 2                                                 | 1                                   | 1                                             | 1                | 8     |
| Andriankaja OM et al., 2007(Male)                                                                                                                                                     | 1                            | 1                           | 1                     | 1                      | 2                                                 | 1                                   | 1                                             | 1                | 9     |
| Andriankaja OM et al., 2007(Female)                                                                                                                                                   | 1                            | 1                           | 1                     | 1                      | 2                                                 | 1                                   | 1                                             | 1                | 9     |
| Renvert S et al.,2010                                                                                                                                                                 | 1                            | 1                           | 1                     | 1                      | 2                                                 | 1                                   | 1                                             | 1                | 9     |
| Holmlund A et al., 2011                                                                                                                                                               | 1                            | 1                           | 1                     | 1                      | 2                                                 | 1                                   | 1                                             | 1                | 9     |

|                                        |                                          |                                 |                           |                                                       |                                                   |                       |                                             |                                  |              |
|----------------------------------------|------------------------------------------|---------------------------------|---------------------------|-------------------------------------------------------|---------------------------------------------------|-----------------------|---------------------------------------------|----------------------------------|--------------|
| Khosravi Samani M et al., 2013         | 1                                        | 1                               | 0                         | 0                                                     | 2                                                 | 1                     | 1                                           | 1                                | 7            |
| Li P et al., 2013                      | 1                                        | 1                               | 1                         | 1                                                     | 2                                                 | 1                     | 1                                           | 1                                | 9            |
| Willershausen I et al.,2014            | 1                                        | 1                               | 1                         | 1                                                     | 2                                                 | 1                     | 1                                           | 1                                | 9            |
| Kodovazenitis G, et al., 2014          | 1                                        | 1                               | 0                         | 1                                                     | 2                                                 | 1                     | 1                                           | 1                                | 8            |
| Rydén L et al., 2016                   | 1                                        | 1                               | 1                         | 1                                                     | 2                                                 | 1                     | 1                                           | 1                                | 9            |
|                                        | <b>Selection</b>                         |                                 |                           |                                                       | <b>Comparability</b>                              | <b>Outcome</b>        |                                             |                                  |              |
| <b>Prospective Cohort studies(n=4)</b> | Representativeness of the exposed cohort | Selection of non-exposed cohort | Ascertainment of exposure | Outcome of interest was not present at start of study | Control for important factor or additional factor | Assessment of outcome | Follow-up long enough for outcomes to occur | Adequacy of follow-up of cohorts | <b>Total</b> |
| Joshi pura KJ et al., 1996             | 0                                        | 1                               | 0                         | 1                                                     | 2                                                 | 1                     | 1                                           | 1                                | 7            |
| Howell TH et al.,2001                  | 1                                        | 1                               | 0                         | 1                                                     | 2                                                 | 1                     | 1                                           | 1                                | 8            |
| Dorn JM et al., 2010                   | 0                                        | 1                               | 1                         | 1                                                     | 2                                                 | 1                     | 1                                           | 1                                | 8            |
| Yu YH et al., 2015                     | 0                                        | 1                               | 0                         | 1                                                     | 2                                                 | 1                     | 1                                           | 1                                | 7            |
