# Supplementary material for: The association between periodontal disease and the risk of myocardial infarction: a pooled analysis of observational studies
Source: PubMed Central journal article supplement (PMC5286862; doi:10.1186/s12872-017-0480-y), 2017-02-01
Supplement: 12872_2017_480_MOESM3_ESM.pdf [file 12872_2017_480_MOESM3_ESM.pdf]

**Table S3. Quality scores of cross-sectional studies using Agency for Healthcare Research and Quality Scale.**

| Methodological quality of studies included in the final analysis based on the Agency for Healthcare Research and Quality(AHRQ)for assessing the quality of cross-sectional studies(n=6)* |     |     |     |         |         |     |     |     |    |     |    |       |
|------------------------------------------------------------------------------------------------------------------------------------------------------------------------------------------|-----|-----|-----|---------|---------|-----|-----|-----|----|-----|----|-------|
| Cross-sectional studies (n=6)                                                                                                                                                            | 1   | 2   | 3   | 4       | 5       | 6   | 7   | 8   | 9  | 10  | 11 | Score |
| Bazile A et al.,2002                                                                                                                                                                     | Yes | Yes | No  | Unclear | Unclear | Yes | No  | Yes | No | Yes | No | 5/11  |
| Buhlin K et al., 2002                                                                                                                                                                    | Yes | No  | No  | Yes     | Unclear | No  | No  | Yes | No | Yes | No | 4/11  |
| Holmlund A et al., 2006                                                                                                                                                                  | Yes | No  | Yes | Unclear | Unclear | Yes | No  | Yes | No | Yes | No | 5/11  |
| Senba T et al., 2008(Male)                                                                                                                                                               | Yes | No  | No  | Yes     | Unclear | No  | Yes | Yes | No | Yes | No | 5/11  |
| Senba T et al., 2008(Female)                                                                                                                                                             | Yes | No  | No  | Yes     | Unclear | No  | Yes | Yes | No | Yes | No | 5/11  |
| Sujal M. Parkar et al., 2013                                                                                                                                                             | Yes | Yes | No  | Unclear | Unclear | Yes | No  | Yes | No | Yes | No | 5/11  |

\*1.Define the source of information(survey, record review)2.List inclusion and exclusion criteria for exposed and unexposed subjects (case and controls ) or refer to previous publications 3.Indicate time period used for identifying patients 4.Indicate whether or not subjects were consecutive if not population-based 5.Indicate if evaluators of subjective components of study were masked to other aspects of the status of the participants 6.Describe any assessments undertaken for quality assurance purposes(e.g., test/retest of primary outcome measurements) 7.Explain any patient exclusion from analysis 8.Describe how confounding was assessed and/or controlled 9.If applicable, explain how missing data were handled in the analysis 10.Summarize patient response rates and completeness of data collection 11.Clarity what follow-up, if any, was expected and the percentage of patients for which incomplete data or follow-up was obtained.
