# Supplementary material for: The association between periodontal disease and the risk of myocardial infarction: a pooled analysis of observational studies
Source: Springer Nature journal article supplement (doi:10.1186/s12872-017-0480-y), 2017-02-01
Supplement: MOESM1 [file 12035410]

**Table S1. Search Strategy.**

| Search Terms                                                                                                                                                                                                                                     |
|--------------------------------------------------------------------------------------------------------------------------------------------------------------------------------------------------------------------------------------------------|
| 1. “periodontal disease [MeSH Terms]” OR “periodontitis [MeSH Terms]” OR “periodontal[free term]” OR “periodontal attachment loss [MeSH Terms]” OR “periodontal pocket [MeSH Terms]” OR “alveolar bone loss [MeSH Terms]”                        |
| 2. “myocardial infarction[MeSH Terms]” OR “acute myocardial infarction[MeSH Terms]” OR “acute coronary syndrome[MeSH Terms]” OR “cardiovascular disease [MeSH Terms]” OR “coronary heart disease [MeSH Terms]” OR “unstable angina [MeSH Terms]” |
| 3. 1 AND 2                                                                                                                                                                                                                                       |
